# Supplementary material for: Insight into the corrosion inhibition of the iron anode with electro-deposited polyaniline during the electrocoagulation treatment process of electroplating wastewater
Source: Royal Society of Chemistry journal article supplement (doi:10.1039/d2ew00689h), 2022-12-09
Supplement: d2ew00689h1.pdf [file d2ew00689h1.pdf]

**Insight into the corrosion inhibition of iron anode with electro-deposited polyaniline during the electrocoagulation treatment process of electroplating wastewater**

Jie Yu<sup>a</sup>, Yunxiao Liu<sup>a</sup>, Han Wang<sup>a,b</sup>, Qun Yan<sup>a,b,c\*</sup>, Jing Luo<sup>d</sup>

*a. School of Environmental and Civil Engineering, Jiangnan University, Wuxi 214122, China.*

*b. Jiangsu Key Laboratory of Anaerobic Biotechnology, Wuxi 214122, China.*

*c. Jiangsu Collaborative Innovation Center of Technology and Material of Water Treatment, Suzhou 215011, China.*

*d. School of Chemical and Material Engineering, Jiangnan University, Wuxi 214122, China.*

\* Corresponding author, Tel.: +86-510-85197872. E-mail: yanqun@jiangnan.edu.cn (Q. Yan)

**The following is included as additional supporting materials for this paper:**

**Table S1.** Water quality index of actual electroplating effluents

| Water quality index | zinc concentration (mg L <sup>-1</sup> ) | nickel concentration (mg L <sup>-1</sup> ) | pH   | electrical conductivity (mS cm <sup>-1</sup> ) | COD (mg L <sup>-1</sup> ) |
|---------------------|------------------------------------------|--------------------------------------------|------|------------------------------------------------|---------------------------|
| Value               | 17.51                                    | 6.35                                       | 7.28 | 5.14                                           | 414.54                    |

| Anode plate | Voltage (V) | Energy consumption (Wh) | Specific energy consumption |
|-------------|-------------|-------------------------|-----------------------------|
|-------------|-------------|-------------------------|-----------------------------|

|                             | (kWh/m <sup>3</sup> ) |       |        |
|-----------------------------|-----------------------|-------|--------|
| Iron                        | 6.29                  | 2.516 | 10.064 |
| Iron modified with PPy-PTS  | 6.67                  | 2.668 | 10.672 |
| Iron modified with PANI-MMT | 6.83                  | 2.732 | 10.928 |

**Table S2.** Energy consumption of different anodes.

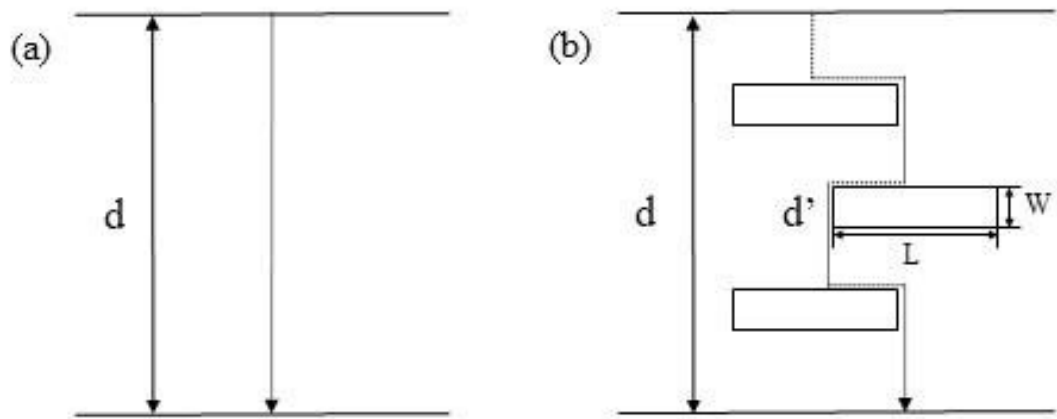

**Fig. S1.** Gas-liquid barrier model without (a) or with (b) layered silicate.

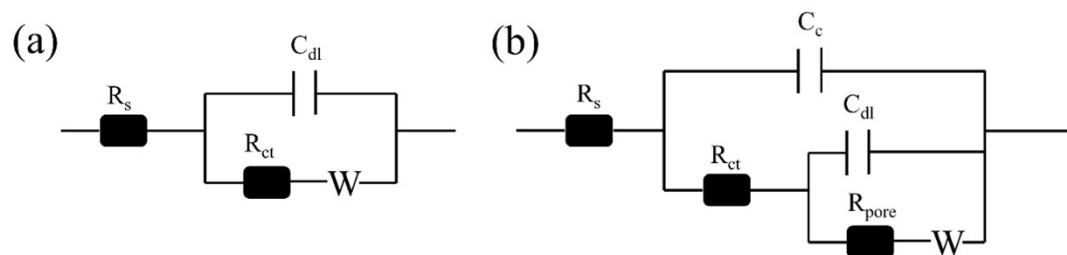

**Fig. S2.** The equivalent circuit diagrams of bare iron electrode (a) and iron electrode coated with polymer (b).

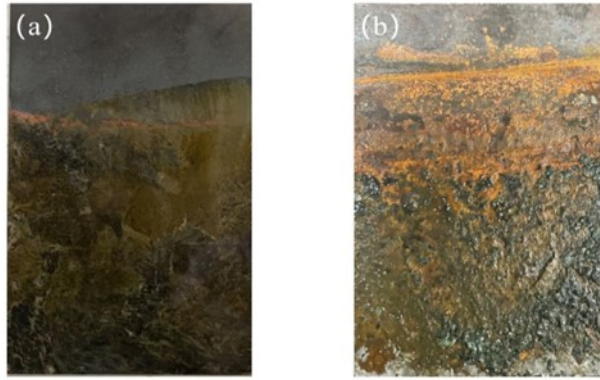

**Fig. S3.** The corrosion condition on the surface of plate modified with PANI-MMT(a) and PPy-PTS(b).

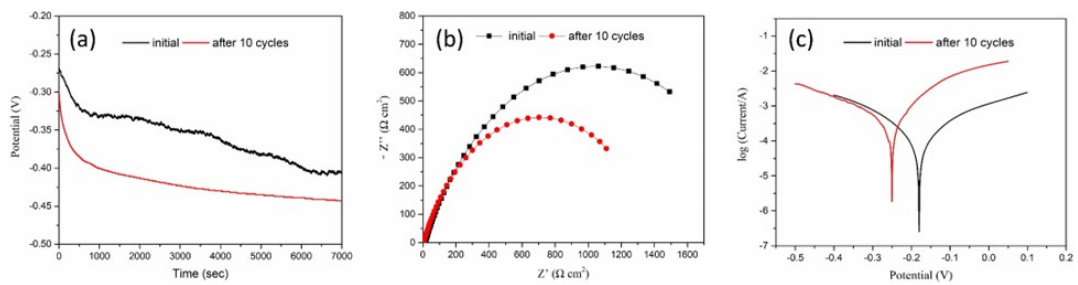

**Fig. S4.** the Open circuit potential (a), Nyquist plots (b) and Tafel plots (c) of PANI-MMT coated anode after 10 cycles.
